# Supplementary material for: Penetrance of a rare familial mutation predisposing to papillary thyroid cancer
Source: Springer Nature journal article supplement (doi:10.1007/s10689-017-0048-0), 2017-10-12
Supplement: MOESM1 [file 15132502]

Supplemental Material

Simplified pedigree of the large family including mutation positive (+), mutation positive obligate carries (+*) and mutation negative (-) individuals. Affected individuals with PTC or ATC are shaded solid blue and navy, respectively, and ages of onset are listed below the individual when available. Diamonds with the number of individuals listed inside indicate grouped individuals. Numbers below individuals indicate the number of mutation positive/negative individuals.

Demographic table including total participants and individuals tested for the 4q32 mutation

|  | **MALE** | **FEMALE** | **TOTAL** |
| --- | --- | --- | --- |
| **Total participants** | 50 | 65 | **115** |
| **Tested participants** | 25 | 43 | **68** |
| Mutation Positive | 17 | 17 | 34 |
| Mutation NegativeE | 8 | 26 | 34 |
